# Supplementary material for: High removal of thiophene from model gasoline by porous MIL-101(Cr)/SA hybrid membrane
Source: Royal Society of Chemistry journal article supplement (doi:10.1039/c8ra06579a), 2018-01-01
Supplement: c8ra06579a1.pdf [file c8ra06579a1.pdf]

**Supporting Information (SI) on**  
**High removal of thiophene from model gasoline by porous MIL-**  
**101(Cr)/SA hybrid membrane**

Wen Bing Wu <sup>a,b\*</sup>, Sun Xue <sup>a</sup>, Jian Hua Chen<sup>b</sup>, Xiao Li <sup>a\*</sup>

<sup>a</sup> *School of Chemical Engineering, Fuzhou University, Fuzhou 350108, China*

<sup>b</sup> *College of Chemistry, Chemical Engineering and Environment, Minnan Normal University,  
Zhangzhou 363000, China*

\* Corresponding author: Wu W.B, e-mail: [wbwu81@126.com](mailto:wbwu81@126.com) (W. B. Wu); Tel: 86-596-2591445; Fax: 86-596-2520035

Corresponding author: Li X, e-mail address: [lxzwy@fzu.edu.cn](mailto:lxzwy@fzu.edu.cn) (X. Li); Tel.: +86 591 87892513; fax: +86 591

87892513

---

<sup>a</sup> Corresponding author: Wu W.B, e-mail: [wbwu81@126.com](mailto:wbwu81@126.com) (W. B. Wu); Tel: 86-596-2591445; Fax: 86-596-2520035

Corresponding author: Li X, e-mail address: [lxzwy@fzu.edu.cn](mailto:lxzwy@fzu.edu.cn) (X. Li); Tel.: +86 591 87892513; fax: +86 591 87892513

## X-ray diffraction (XRD)

**Figure 1S** shows the XRD patterns of the MIL-101(Cr) nanoparticles and porous MIL-101(Cr)/SA hybrid membrane. The X-ray diffraction pattern showed that as-synthesized MIL-101(Cr) nanoparticles presented many diffraction peaks, such as  $5.892^\circ$ ,  $8.902^\circ$  and  $16.527^\circ$ , which matched well with the previously reported. From **Figure 1S**, one can also find that the diffraction peaks mentioned above all can be seen in the porous MIL-101(Cr)/SA hybrid membrane.

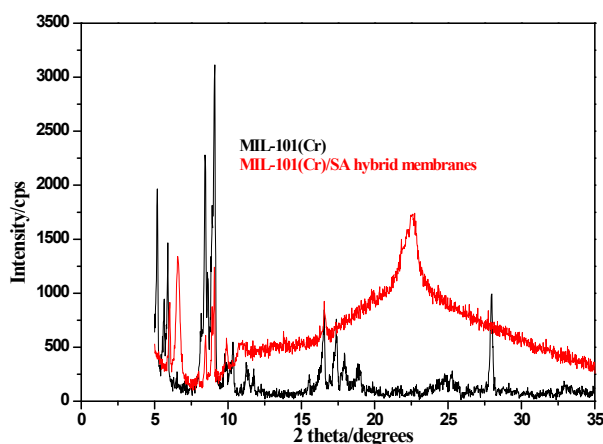

**Figure S1:** XRD patterns of MIL-101(Cr) nanoparticles and porous MIL-101(Cr)/SA hybrid membrane

## Scanning electron microscope(SEM) analysis of MIL-101(Cr) nanoparticles

The morphology of the MIL-101(Cr) nanoparticles samples were examined by SEM and shown in **Figure S2**. It can be found from **Figure S2** that the size of as-prepared MIL-101(Cr) nanoparticles is about 61 nm.

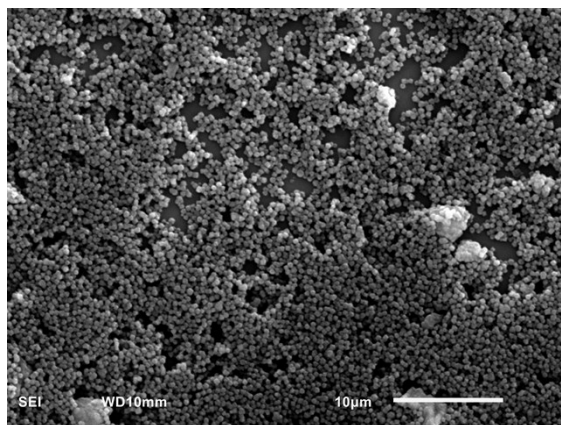

**Figure S2:** SEM image of MIL-101(Cr) nanoparticles

### Fourier transformed infrared spectrum(FT-IR)

The chemical property of MIL-101(Cr) nanoparticles was studied by FT-IR spectroscopy and shown in **Figure S3**. The band corresponding to COO<sup>-</sup> stretching vibrations can be seen at 592 cm<sup>-1</sup>. The band corresponding to benzene ring presents in the spectral region of 1023-746 cm<sup>-1</sup>. The band appeared in the vicinity of 1631 cm<sup>-1</sup> can be attributed to the vibration of -O-C-O- skeleton. The band in the vicinity of 1750 cm<sup>-1</sup> corresponding to stretching of carbonyl of terephthalic acid can not be seen, indicating that terephthalic acid has been moved.

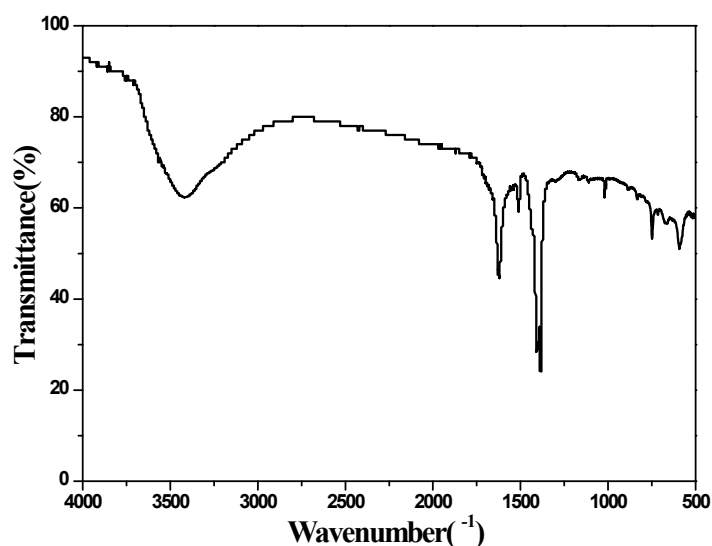

**Fig. S3:** FT-IR spectra of MIL-101(Cr) nanoparticles.

### Specific surface areas and pore size distributions

The specific surface area and pore structure of the as-prepared MIL-101(Cr) nanoparticles was analyzed on the basis of nitrogen adsorption-desorption isotherms at -196 °C and shown in **Figure S4 (a) and (b)**. Because there are two different sizes of cage-like structures in the MIL-101(Cr) nanoparticles, therefore, in the initial stage, with the increase of P/P<sub>0</sub>, adsorption capacity of the MIL-101(Cr) nanoparticles increased dramatically, indicating that there are lots of microporous structures. Surface area of MIL-101(Cr) nanoparticles calculated from BET analysis

is 4315 m<sup>2</sup>/g. As can be seen from pore size distributions in **Figure S4**, pore sizes are concentrated in 1nm.

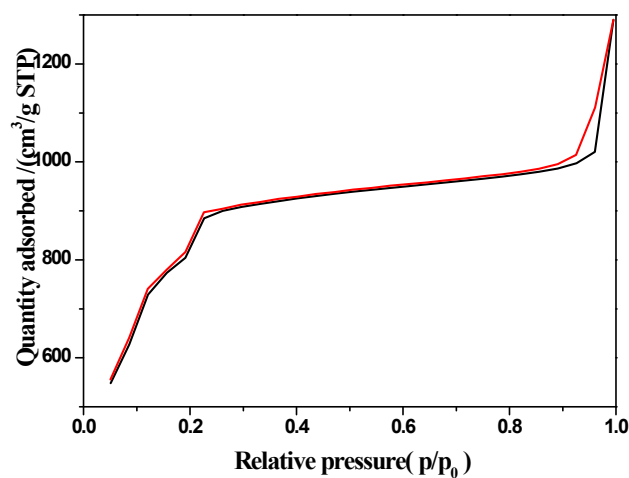

(a)

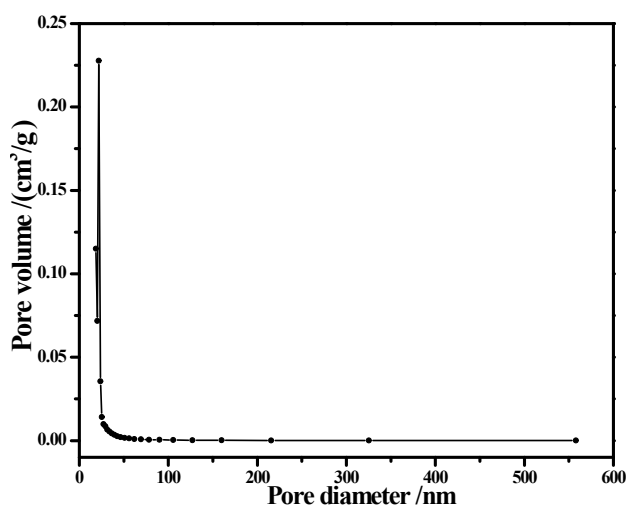

(b)

**Figure S4:** (a) N<sub>2</sub> adsorption analysis the BET surface area of MIL-101(Cr) nanoparticles; (b) pore size distribution of MIL-101(Cr) nanoparticles.

### Effects of MIL-101(Cr) nanoparticles content on adsorption capacity

To investigate the effects of the content of MIL-101(Cr) nanoparticles on the adsorption capacity, we carried out adsorption experiments at adsorbent dose of 0.25 g/L, initial thiophene concentration of 500 mg/L, and at 25 °C. It can be found from **Figure S5** that the saturated

adsorption capacity initially increased with higher content of MIL-101(Cr). This can be attributed the amount of adsorption sites in MIL-101(Cr)/SA hybrid membrane are enhanced when more amount of MIL-101(Cr) nanoparticles were added to the SA matix. As the content of MIL-101(Cr) nanoparticles arrives at 4.0 wt%, a turning point appears on the curve, and after this point, the adsorption capacity of MIL-101(Cr)/SA hybrid membrane decreases rapidly. This result indicates that under the condition of the content of MIL-101(Cr) nanoparticles of 4.0 wt%, a maximum adsorption sites in MIL-101(Cr)/SA hybrid membrane can be availble for thiophene. Therefore, the MIL-101(Cr)/SA hybrid membrane with MIL-101(Cr) nanoparticles content of 4.0 wt% was used for further adsorption experiments.

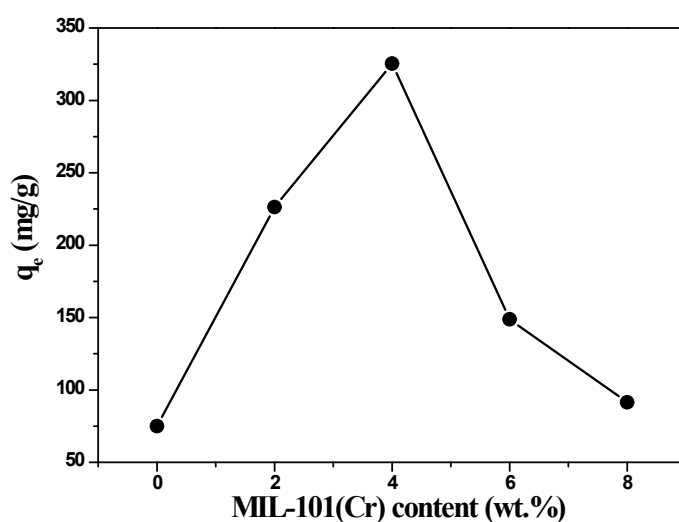

**Figure S5:** Effect of MIL-101(Cr) content on adsorption property
